# Supplementary material for: Inflammasome induction in Rasmussen’s encephalitis: cortical and associated white matter pathogenesis
Source: PubMed Central journal article supplement (PMC3881507; doi:10.1186/1742-2094-10-152), 2013-12-13
Supplement: 1742-2094-10-152-S1.pdf [file 1742-2094-10-152-S1.pdf]

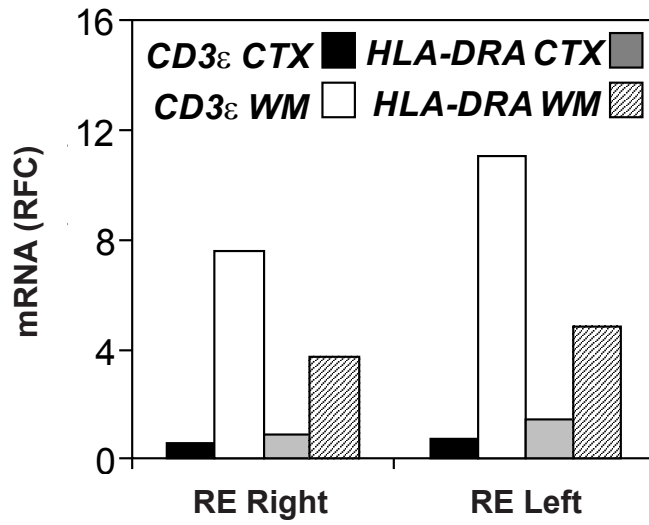

**Supplementary Figure 1:** CD3ε and HLA-DRA expression in cortex and white matter of Patient 3 comparing right and left hemispheres revealed markedly increased expression in white matter bilaterally with minimal gene expression changes in cortex. All values were normalized to GAPDH expression.
