# Supplementary material for: Inflammasome induction in Rasmussen’s encephalitis: cortical and associated white matter pathogenesis
Source: PubMed Central journal article supplement (PMC3881507; doi:10.1186/1742-2094-10-152), 2013-12-13
Supplement: 1742-2094-10-152-S3.pdf [file 1742-2094-10-152-S3.pdf]

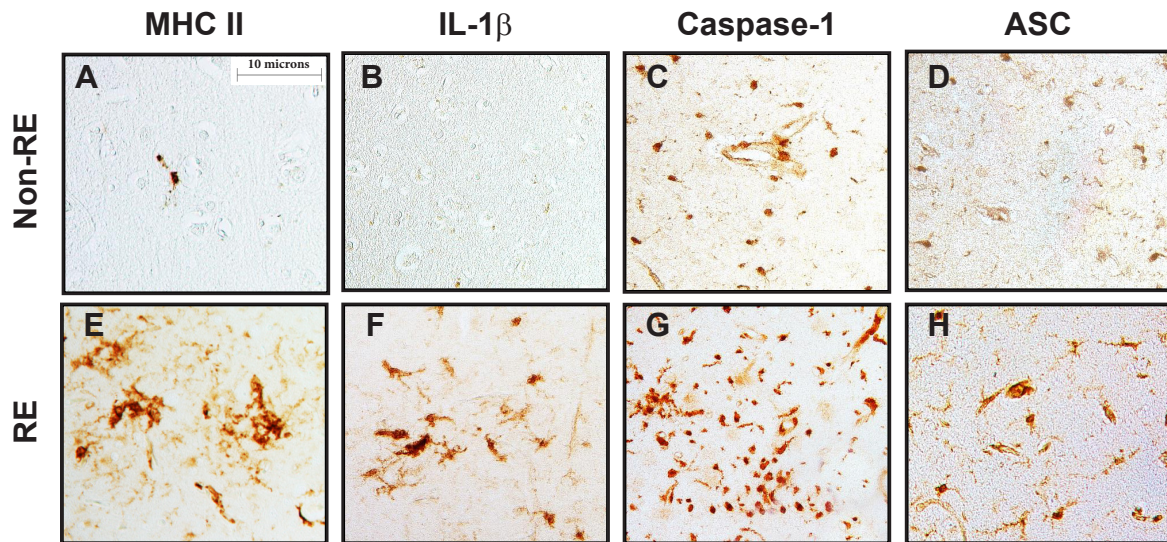

**Supplementary Figure 3:** Cortical changes in RE. (A) MHC Class II expression in cortex of non-RE patient compared with RE (E). IL-1 $\beta$  immunoreactivity in non-RE cortex (B) compared to RE cortex (F). Caspase-1 immunoreactivity in non-RE cortex (C) compared with RE cortex (G). ASC immunolabeling of macrophages in non-RE (D) and RE (H) cortex. (Original magnification 200X)
